# Supplementary material
Source: publisher figshare collection journal article supplement (https://karger.figshare.com/articles/dataset/_/25400323)

**Fig. S1.** Graphical presentation of the dimensional stability of KS scale items

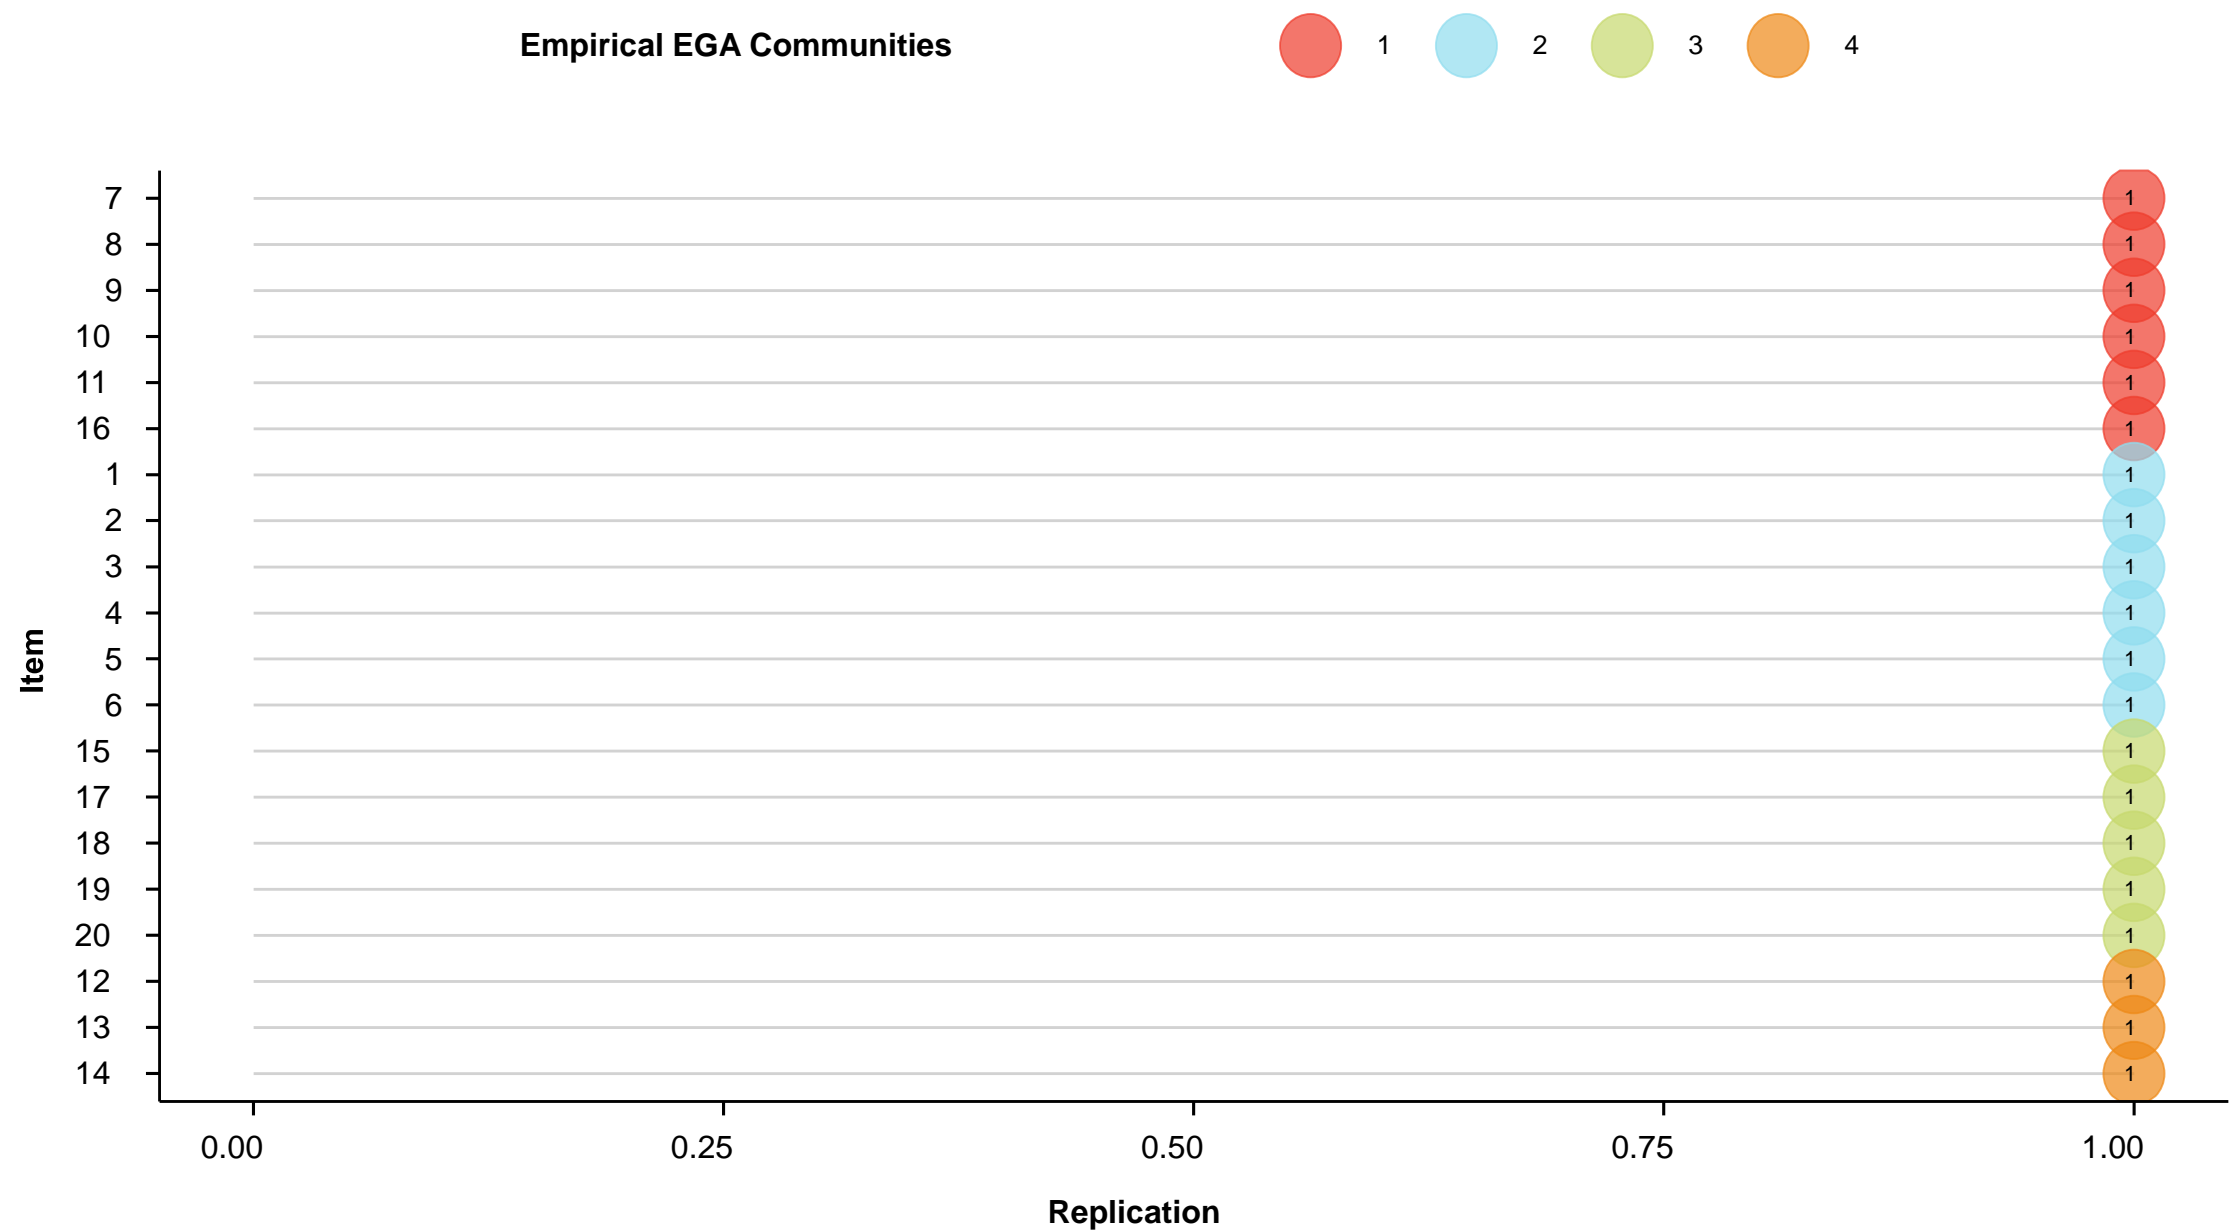

Supplement: Supplementary file 1 [file 1]
